# Supplementary material for: The Role of the Gut Microbiota on the Beneficial Effects of Ketogenic Diets
Source: MDPI journal article supplement (doi:10.3390/nu14010191), 2021-12-31
Supplement: s1 [file s1]

Table S1. Search terms.

| Search terms                                                                                                                                                                                                                   |
|--------------------------------------------------------------------------------------------------------------------------------------------------------------------------------------------------------------------------------|
| Obesity                                                                                                                                                                                                                        |
| (((((ketogenic diet[tiab]) OR (ketogenic diet[mesh])) OR (low carbohydrate diet)) AND ((gut microbiota[mesh]) OR (gut microbiot*[tiab])))) AND (central adiposity OR obesity OR overweight OR body composition OR weight-loss) |
|                                                                                                                                                                                                                                |
| Dyslipidemia                                                                                                                                                                                                                   |
| (((((ketogenic diet[tiab]) OR (ketogenic diet[mesh])) OR (low carbohydrate diet)) AND ((gut microbiota[mesh]) OR (gut microbiot*[tiab])))) AND (dyslipidemia OR cholesterol OR LDL OR VLDL OR HDL)                             |
|                                                                                                                                                                                                                                |
| insulin resistance                                                                                                                                                                                                             |
| (((((ketogenic diet[tiab]) OR (ketogenic diet[mesh])) OR (low carbohydrate diet)) AND ((gut microbiota[mesh]) OR (gut microbiot*[tiab])))) AND (insulin OR insulin resistance OR glucose OR diabetes)                          |
| seizure                                                                                                                                                                                                                        |
| (((((ketogenic diet[tiab]) OR (ketogenic diet[mesh])) OR (low carbohydrate diet)) AND ((gut microbiota[mesh]) OR (gut microbiot*[tiab])))) AND (seizure OR epilepsy)                                                           |
|                                                                                                                                                                                                                                |
| NB: searches were also combined                                                                                                                                                                                                |
